# Supplementary material for: Landscape response to tectonic deformation and cyclic climate change since ca. 800 ka in the southern central Andes
Source: Copernicus journal article supplement (doi:10.5194/esurf-12-1391-2024), 2024-12-12
Supplement: Supplementary file 1 [file esurf-12-1391-2024-supplement.zip]

## Sheet: Overview
COSMOGENIC DATING OF TORO FANS
Worksheet	Description
1) Sample properties	Details of surface boulder and depth profile samples of this study.
2) Sample preparation for AMS measurement	Overview of crushing, sieving and cleaning procedure for samples
3) Be-10 concentration data	Overview of Be-10 data and concentration calculation for samples
4) Be-10 boulder age data	Overview of Be-10 age data including CREp calculator input
5) Qf_1 depth profile	Sample depths and measured Be-10 concentrations of Qf_1 depth profile.

## Sheet: 1) Sample properties
Table S2.1: Properties of surface boulder and depth profile samples
Sample	LOCATION			FIELD SAMPLING DETAILS
	Latitude	Longitude	Elevation	Date	Sample type1	Boulder dimensions (cm)			Boulder sample thickness	No. clasts	Pebble sample depth	Sample approx mass
	(°S)	(°W)	(m asl)			a	b	c	(cm)		(cm)	(g)
Qf_1
Depth profile
TB19_01A	24.3849	65.7689	3556	2019-07-30	P	-	-	-	-	90	0-10	1250
TB19_01B	24.3849	65.7689	3556	2019-07-31	P	-	-	-	-	68	20-30	1000
TB19_01C	24.3849	65.7689	3556	2019-08-01	P	-	-	-	-	82	40-50	1400
TB19_01D	24.3849	65.7689	3556	2019-08-02	P	-	-	-	-	82	60-70	1400
TB19_01E	24.3849	65.7689	3556	2019-08-03	P	-	-	-	-	85	≥120	1400
Surface boulders
TB19_02	24.3839	65.771	3567	2019-07-30	B	35	35	20	2	-	-	350
TB19_03	24.3841	65.7716	3559	2019-07-31	B	50	38	30	2	-	-	400
TB19_04	24.3834	65.7713	3558	2019-08-01	B	45	40	20	2	-	-	400
TB19_05	24.3831	65.7716	3552	2019-08-02	B	65	50	35	2	-	-	450
Qf_2
TB19_06	24.4252	65.7678	3560	2019-07-28	B	60	45	30	1	-	-	500
TB19_07	24.4257	65.7668	3570	2019-07-29	B	45	40	20	2	-	-	400
TB19_08	24.4257	65.7661	3581	2019-07-30	B	85	55	30	2	-	-	600
Qf_3
TB19_11	24.4088	65.7502	3644	2019-07-27	B	65	50	30	1	-	-	650
TB19_12	24.4092	65.7486	3658	2019-07-28	B	85	55	35	3	-	-	600
TB19_13	24.4098	65.7481	3660	2019-07-29	B	95	80	30	3	-	-	450
TB19_14	24.4101	65.7477	3673	2019-07-30	B	60	50	35	3	-	-	400
Qf_4
TB19_17	24.4167	65.7606	3509	2019-07-28	B	50	30	20	1	-	-	300
TB19_18	24.4168	65.76	3512	2019-07-29	B	50	30	30	2	-	-	400
TB19_19	24.4165	65.7592	3519	2019-07-30	B	70	60	27	3	-	-	700
TB19_20	24.4153	65.7568	3541	2019-07-31	B	40	30	23	1	-	-	500
Qf_5
TB19_22	24.3824	65.7614	3404	2019-07-30	B	55	40	25	2	-	-	450
TB19_23	24.3826	65.7611	3407	2019-07-31	B	37	30	25	2	-	-	400
TB19_24	24.3828	65.7614	3405	2019-08-01	B	35	30	20	3	-	-	750
Qf_6
TB19_26	24.4192	65.7562	3531	2019-07-28	B	85	50	45	2	-	-	550
TB19_27	24.4192	65.7558	3532	2019-07-29	B	90	50	40	1	-	-	500
TB19_28	24.4192	65.7557	3541	2019-07-30	B	87	53	30	2	-	-	500
TB19_29	24.4194	65.7565	3525	2019-07-31	B	90	55	40	3	-	-	500
Qf_7
TB19_33	24.4035	65.7511	3557	2019-07-27	B	95	50	40	1	-	-	650
TB19_34	24.4037	65.7511	3555	2019-07-28	B	90	70	50	2	-	-	550
TB19_35	24.402	65.7498	3563	2019-07-29	B	55	50	45	3	-	-	550
Qf_8
TB19_38	24.394	65.7471	3533	2019-07-25	B	180	118	74	1	-	-	450
TB19_42	24.3927	65.745	3553	2019-07-26	B	95	72	70	1	-	-	700
TB19_45	24.3904	65.7494	3510	2019-07-27	B	95	65	40	1	-	-	550
TB19_46	24.3914	65.7503	3502	2019-07-28	B	160	140	55	1	-	-	750
1: Sample type: P- pebble, B- boulder

## Sheet: 2) Sample preparation
Table S2.2: Details of sample crushing, sieving and cleaning
	SAMPLE CRUSHING AND SEPARATION						SAMPLE CLEANING
Sample name	Sample mass	Crushing/sieving- fraction sizes					Batch No.	Cleaning procedure	Quartz processed
		>1000 µm	>500/500-1000 µm	250-500 µm	<250 µm	Total
	(g)	(g)	(g)	(g)	(g)	(g)			(g)
Qf_1
Depth profile
TB19_01A	1250	114	376	225	385	1100	4	1x 9% HCl, 3x 2% HF	8.8011
TB19_01B	1000	97	313	180	301	891	4	1x 9% HCl, 3x 2% HF	8.88407
TB19_01C	1400	164	499	218	375	1256	4	1x 9% HCl, 3x 2% HF	9.46033
TB19_01D	1400	262	355	213	365	1195	4	1x 9% HCl, 3x 2% HF	12.2422
TB19_01E	1400	275	340	173	343	1131	4	1x 9% HCl, 3x 2% HF	10.9308
Surface boulders
TB19_02	350	-	65	121	90	276	1	1x 9% HCl, 3x 2% HF	26.8014
TB19_03	400	-	65	61	91	217	2	1x 9% HCl, 3x 2% HF	4.9002
TB19_04	400	-	41	97	110	248	2	1x 9% HCl, 3x 2% HF	5.97105
TB19_05	450	-	176	131	170	477	2	1x 9% HCl, 3x 2% HF	5.81855
Qf_2
TB19_06	500	-	85	104	154	343	1	1x 9% HCl, 3x 2% HF	24.585
TB19_07	400	-	94	121	69	284	2	1x 9% HCl, 3x 2% HF	5.97628
TB19_08	600	-	94	148	191	433	2	1x 9% HCl, 3x 2% HF	6.10162
Qf_3
TB19_11	650	-	224	148	150	522	1	1x 9% HCl, 3x 2% HF	25.4362
TB19_12	600	-	130	177	92	399	2	1x 9% HCl, 3x 2% HF	5.9805
TB19_13	450	-	110	103	86	299	2	1x 9% HCl, 3x 2% HF	5.7582
TB19_14	400	-	83	68	86	237	2	1x 9% HCl, 3x 2% HF	4.54873
Qf_4
TB19_17	300	-	63	52	73	188	1	1x 9% HCl, 3x 2% HF	6.69
TB19_18	400	-	104	116	83	303	2	1x 9% HCl, 3x 2% HF	6.0708
TB19_19	700	-	73	157	187	417	2	1x 9% HCl, 3x 2% HF	5.8213
TB19_20	500	-	89	74	80	243	2	1x 9% HCl, 3x 2% HF	6.10092
Qf_5
TB19_22	450	-	99	101	222	422	1	1x 9% HCl, 3x 2% HF	28.5938
TB19_23	400	-	89	83	113	285	4	1x 9% HCl, 3x 2% HF	7.4773
TB19_24	750	-	171	114	159	444	4	1x 9% HCl, 3x 2% HF	7.96893
Qf_6
TB19_26	550	-	154	72	81	307	1	1x 9% HCl, 3x 2% HF	27.2921
TB19_27	500	-	100	91	92	283	3	1x 9% HCl, 3x 2% HF	6.36507
TB19_28	500	-	140	92	108	340	3	1x 9% HCl, 3x 2% HF	6.85563
TB19_29	500	-	122	117	132	371	3	1x 9% HCl, 3x 2% HF	6.85837
Qf_7
TB19_33	650	-	180	72	95	347	1	1x 9% HCl, 3x 2% HF	11.6954
TB19_34	550	-	146	103	173	422	3	1x 9% HCl, 3x 2% HF	6.04642
TB19_35	550	-	146	101	167	414	3	1x 9% HCl, 3x 2% HF	3.9339
Qf_8
TB19_38	450	-	99	103	122	324	1	1x 9% HCl, 3x 2% HF	30.307
TB19_42	700	-	111	101	185	397	3	1x 9% HCl, 3x 2% HF	5.42521
TB19_45	550	-	90	162	179	431	3	1x 9% HCl, 3x 2% HF	6.72537
TB19_46	750	-	163	196	208	567	3	1x 9% HCl, 3x 2% HF	5.9713

## Sheet: 3) Be-10 concentration data
Table S2.3: AMS results and Be-10 concentrations of samples
SAMPLE DETAILS				AMS RESULTS					CONSTANTS				LABORATORY DATA							FINAL CONCENTRATIONS
Sample Name	Processing batch	Batch blanks	Standards used	10Be/9Be	10Be/9Be 1s	10Be/9Be 1s	avg. 9Be current	Total 10Be counts	Avogadros number	Molar weight 10Be	10/9 ratio of blank	Mass of 9Be atoms per 1 g carrier solution	Mass quartz	Amount 9Be natural (measured by OES)	Sample 9Be carrier solution mass added (g)	Sample mass of 9Be atoms in carrier solution	Blank 9Be carrier mass added	Blank mass of 9Be atoms in carrier solution	Number of 10Be atoms in the blank used	Number 10Be atoms in sample	Uncertainty in the 10Be
						(%)	(A)					(g)	(g)	(at/g)	(g)	(g)	(g)		(atoms)	(at/g SiO2)	(at/g SiO2)
Qf_1
Depth profile
TB19_01A	4	TB19_BLK5	KN01-6-2 (5.35x10-13), KN01-5-3 (6.320x10-12)	1.228e-11	3.76e-13	3.06	1.345e-06	85252	6.0228e+23	9.012	2.616e-14	0.00077	8.8011	0	0.2089	0.000160853	0.2087	0.000160699	280949	1.49673e+07	483138
TB19_01B	4	TB19_BLK5		1.01e-11	3.09e-13	3.06	1.45e-06	75452	6.0228e+23	9.012	2.616e-14	0.00077	8.88407	0	0.2081	0.000160237	0.2087	0.000160699	280949	1.21428e+07	391866
TB19_01C	4	TB19_BLK5		9.57e-12	2.93e-13	3.06	1.611e-06	79600	6.0228e+23	9.012	2.616e-14	0.00077	9.46033	0	0.2095	0.000161315	0.2087	0.000160699	280949	1.08761e+07	351265
TB19_01D	4	TB19_BLK5		9.975e-12	3.05e-13	3.06	1.805e-06	92897	6.0228e+23	9.012	2.616e-14	0.00077	12.2422	0	0.2094	0.000161238	0.2087	0.000160699	280949	8.75715e+06	282463
TB19_01E	4	TB19_BLK5		5.068e-12	1.56e-13	3.08	1.539e-06	40201	6.0228e+23	9.012	2.616e-14	0.00077	10.9308	0	0.2081	0.000160237	0.2087	0.000160699	280949	4.93936e+06	160708
Surface boulders
TB19_02	1	TB19_BLK1, 2		6.157e-11	1.88e-12	3.06	1.147e-06	333574	6.0228e+23	9.012	2.1595e-14	0.00077	26.8014	0	0.2048	0.000157696	0.2054	0.000158158	228256	2.42023e+07	777898
TB19_03	2	TB19_BLK3		6.972e-12	2.13e-13	3.06	1.684e-06	58693	6.0228e+23	9.012	5.494e-14	0.00077	4.9002	0	0.2206	0.000169862	0.2204	0.000169708	623115	1.60245e+07	519278
TB19_04	2	TB19_BLK3		1.176e-11	3.6e-13	3.06	1.907e-06	46959	6.0228e+23	9.012	5.494e-14	0.00077	5.97105	0	0.2214	0.000170478	0.2204	0.000169708	623115	2.23346e+07	722662
TB19_05	2	TB19_BLK3		8.715e-12	2.68e-13	3.07	1.958e-06	35739	6.0228e+23	9.012	5.494e-14	0.00077	5.81855	0	0.2216	0.000170632	0.2204	0.000169708	623115	1.6973e+07	552361
Qf_2
TB19_06	1	TB19_BLK1, 2	KN01-6-2 (5.35x10-13), KN01-5-3 (6.320x10-12)	2.653e-11	8.14e-13	3.07	1.055e-06	134897	6.0228e+23	9.012	2.1595e-14	0.00077	24.585	0	0.2048	0.000157696	0.2054	0.000158158	228256	1.13635e+07	367008
TB19_07	2	TB19_BLK3		8.917e-12	2.74e-13	3.08	1.786e-06	33346	6.0228e+23	9.012	5.494e-14	0.00077	5.97628	0	0.2228	0.000171556	0.2204	0.000169708	623115	1.70026e+07	552838
TB19_08	2	TB19_BLK3		5.499e-12	1.7e-13	3.08	1.843e-06	29712	6.0228e+23	9.012	5.494e-14	0.00077	6.10162	0	0.2217	0.000170709	0.2204	0.000169708	623115	1.01797e+07	334148
Qf_3
TB19_11	1	TB19_BLK1, 2	KN01-6-2 (5.35x10-13), KN01-5-3 (6.320x10-12)	3.322e-11	1.02e-12	3.06	2.077e-06	331313	6.0228e+23	9.012	2.1595e-14	0.00077	25.4362	0	0.23	0.0001771	0.2054	0.000158158	228256	1.54487e+07	499156
TB19_12	2	TB19_BLK3		9.561e-12	2.95e-13	3.09	1.748e-06	27959	6.0228e+23	9.012	5.494e-14	0.00077	5.9805	0	0.2208	0.000170016	0.2204	0.000169708	623115	1.80607e+07	589212
TB19_13	2	TB19_BLK3		9.05e-12	2.78e-13	3.07	1.676e-06	38046	6.0228e+23	9.012	5.494e-14	0.00077	5.7582	0	0.2211	0.000170247	0.2204	0.000169708	623115	1.77739e+07	577727
TB19_14	2	TB19_BLK3		4.532e-12	1.42e-13	3.13	1.641e-06	15584	6.0228e+23	9.012	5.494e-14	0.00077	4.54873	0	0.2207	0.000169939	0.2204	0.000169708	623115	1.11784e+07	372277
Qf_4
TB19_17	1	TB19_BLK1, 2	KN01-6-2 (5.35x10-13), KN01-5-3 (6.320x10-12)	9.761e-12	3.02e-13	3.09	9.207e-07	43635	6.0228e+23	9.012	2.1595e-14	0.00077	6.69	0	0.1967	0.000151459	0.2054	0.000158158	228256	1.47345e+07	480223
TB19_18	2	TB19_BLK3		9.22e-12	2.81e-13	3.05	1.552e-06	71897	6.0228e+23	9.012	5.494e-14	0.00077	6.0708	0	0.2222	0.000171094	0.2204	0.000169708	623115	1.72632e+07	557069
TB19_19	2	TB19_BLK3		9.75e-12	2.97e-13	3.05	1.614e-06	79183	6.0228e+23	9.012	5.494e-14	0.00077	5.8213	0	0.2224	0.000171248	0.2204	0.000169708	623115	1.90614e+07	614602
TB19_20	2	TB19_BLK3		1.147e-11	3.51e-13	3.06	2.045e-06	58795	6.0228e+23	9.012	5.494e-14	0.00077	6.10092	0	0.2224	0.000171248	0.2204	0.000169708	623115	2.14143e+07	692736
Qf_5
TB19_22	1	TB19_BLK1, 2	KN01-6-2 (5.35x10-13), KN01-5-3 (6.320x10-12)	5.463e-12	1.7e-13	3.12	1.011e-06	26808	6.0228e+23	9.012	2.1595e-14	0.00077	28.5938	0	0.2061	0.000158697	0.2054	0.000158158	228256	2.01832e+06	66237.1
TB19_23	4	TB19_BLK5		1.647e-12	5.2e-14	3.16	1.606e-06	13650	6.0228e+23	9.012	2.616e-14	0.00077	7.4773	0	0.2094	0.000161238	0.2087	0.000160699	280949	2.33595e+06	78666
TB19_24	4	TB19_BLK5		2.088e-12	6.56e-14	3.14	1.527e-06	16438	6.0228e+23	9.012	2.616e-14	0.00077	7.96893	0	0.2077	0.000159929	0.2087	0.000160699	280949	2.76524e+06	92378.3
Qf_6
TB19_26	1	TB19_BLK1, 2	KN01-6-2 (5.35x10-13), KN01-5-3 (6.320x10-12)	5.765e-12	1.8e-13	3.11	9.834e-07	27544	6.0228e+23	9.012	2.1595e-14	0.00077	27.2921	0	0.1991	0.000153307	0.2054	0.000158158	228256	2.15586e+06	70960.4
TB19_27	3	TB19_BLK4		1.569e-12	4.98e-14	3.17	1.489e-06	12115	6.0228e+23	9.012	4.478e-15	0.00077	6.36507	0	0.1992	0.000153384	0.1986	0.000152922	45764.8	2.51965e+06	84097.7
TB19_28	3	TB19_BLK4		1.49e-12	4.88e-14	3.27	8.868e-07	6858	6.0228e+23	9.012	4.478e-15	0.00077	6.85563	0	0.199	0.00015323	0.1986	0.000152922	45764.8	2.21899e+06	76225.5
TB19_29	3	TB19_BLK4		1.661e-12	5.31e-14	3.2	1.213e-06	10435	6.0228e+23	9.012	4.478e-15	0.00077	6.85837	0	0.1988	0.000153076	0.1986	0.000152922	45764.8	2.47094e+06	82999.1
Qf_7
TB19_33	1	TB19_BLK1, 2	KN01-6-2 (5.35x10-13), KN01-5-3 (6.320x10-12)	1.324e-12	4.37e-14	3.3	1.002e-06	6448	6.0228e+23	9.012	2.1595e-14	0.00077	11.6954	0	0.2136	0.000164472	0.2054	0.000158158	228256	1.22483e+06	42968.3
TB19_34	3	TB19_BLK4		1.044e-12	3.38e-14	3.24	1.391e-06	8153	6.0228e+23	9.012	4.478e-15	0.00077	6.04642	0	0.2108	0.000162316	0.1986	0.000152922	45764.8	1.86544e+06	63480.5
TB19_35	3	TB19_BLK4		8.133e-13	2.71e-14	3.33	1.176e-06	5376	6.0228e+23	9.012	4.478e-15	0.00077	3.9339	0	0.1991	0.000153307	0.1986	0.000152922	45764.8	2.10657e+06	73719.3
Qf_8
TB19_38	1	TB19_BLK1, 2	KN01-6-2 (5.35x10-13), KN01-5-3 (6.320x10-12)	3.472e-12	1.08e-13	3.12	1.546e-06	26133	6.0228e+23	9.012	2.1595e-14	0.00077	30.307	0	0.2446	0.000188342	0.2054	0.000158158	228256	1.43446e+06	47122.6
TB19_42	3	TB19_BLK4		6.829e-13	2.26e-14	3.31	1.51e-06	5797	6.0228e+23	9.012	4.478e-15	0.00077	5.42521	0	0.2213	0.000170401	0.1986	0.000152922	45764.8	1.42504e+06	49580.6
TB19_45	3	TB19_BLK4		4.17e-13	1.51e-14	3.61	1.228e-06	2622	6.0228e+23	9.012	4.478e-15	0.00077	6.72537	0	0.1987	0.000152999	0.1986	0.000152922	45764.8	627190	23847.4
TB19_46	3	TB19_BLK4		8.451e-13	2.82e-14	3.34	1.202e-06	5271	6.0228e+23	9.012	4.478e-15	0.00077	5.9713	0	0.199	0.00015323	0.1986	0.000152922	45764.8	1.44164e+06	50504.8
PROCESSING BLANKS
Batch 1
TB19_BLK1			KN01-6-2 (5.35x10-13), KN01-5-3 (6.320x10-12)	2.433e-14	2.58e-15	10.6	8.166e-07	97	6.0228e+23	9.012	2.1595e-14	0.00077	0	-	0.2058	0.000158466	0.2054	0.000158158	228256	-	-
TB19_BLK2				1.886e-14	2.15e-15	11.39	9.08e-07	83	6.0228e+23	9.012	2.1595e-14	0.00077	0	-	0.205	0.00015785	0.2054	0.000158158	228256	-	-
Batch 2
TB19_BLK3			KN01-6-2 (5.35x10-13), KN01-5-3 (6.320x10-12)	5.494e-14	3.67e-15	6.68	1.752e-06	282	6.0228e+23	9.012	5.494e-14	0.00077	0	-	0.2204	0.000169708	0.2204	0.000169708	623115
Batch 3
TB19_BLK4			KN01-6-2 (5.35x10-13), KN01-5-3 (6.320x10-12)	4.478e-15	7.91e-16	17.67	1.423e-06	33	6.0228e+23	9.012	4.478e-15	0.00077	0	-	0.1986	0.000152922	0.1986	0.000152922	45764.8	-	-
Batch 4
TB19_BLK5			KN01-6-2 (5.35x10-13), KN01-5-3 (6.320x10-12)	2.616e-14	2.1e-15	8.03	1.338e-06	181	6.0228e+23	9.012	2.616e-14	0.00077	0	-	0.2087	0.000160699	0.2087	0.000160699	280949	-	-

## Sheet: 4) Be-10 boulder age data
Table S2.4: Be-10 boulder exposure ages of sampled fan surfaces
	CREP CALCULATOR INPUT									Be-10 EXPOSURE AGES1
Sample Name	Latitude	Longitude	Elevation	Be-10 Conc	1s	Shield. Corr	Density	Thickness	Erosion	Exposure age	Uncertainty
	(°S)	(°W)	(m asl)	(at/g SiO2)	(at/g SiO2)			(cm)	(cm/yr)	(ka)	(ka)
Qf_1
TB19_02	-24.3849	-65.7689	3556	2.42023e+07	777898	0.99	2.75	1	0	966.63	109.78
TB19_03	-24.3849	-65.7689	3556	1.60245e+07	519278	0.99	2.75	1	0	593.11	59.1
TB19_04	-24.3849	-65.7689	3556	2.23346e+07	722662	0.99	2.75	1	0	884.41	95.34
TB19_05	-24.3849	-65.7689	3556	1.6973e+07	552361	0.99	2.75	1	0	639.17	63.94
Qf_2
TB19_06	-24.4252	-65.7678	3560	1.13635e+07	367008	0.999179	2.75	1	0	391.94	37.913
TB19_07	-24.4257	-65.7668	3570	1.70026e+07	552838	0.999179	2.75	2	0	631.77	64.095
TB19_08	-24.4257	-65.7661	3581	1.01797e+07	334148	0.999179	2.75	2	0	336.94	33.173
Qf_3
TB19_11	-24.4088	-65.7502	3644	1.54487e+07	499156	0.998296	2.75	1	0	533.56	52.883
TB19_12	-24.4092	-65.7486	3658	1.80607e+07	589212	0.998296	2.75	3	0	651.82	66.212
TB19_13	-24.4098	-65.7481	3660	1.77739e+07	577727	0.998296	2.75	3	0	634.67	64.633
TB19_14	-24.4101	-65.7477	3673	1.11784e+07	372277	0.998296	2.75	3	0	361.38	35.486
Qf_4
TB19_17	-24.4167	-65.7606	3509	1.47345e+07	480223	0.998738	2.75	1	0	548.44	54.596
TB19_18	-24.4168	-65.76	3512	1.72632e+07	557069	0.998738	2.75	2	0	679.67	68.231
TB19_19	-24.4165	-65.7592	3519	1.90614e+07	614602	0.998738	2.75	3	0	778.81	79.15
TB19_20	-24.4153	-65.7568	3541	2.14143e+07	692736	0.998738	2.75	1	0	847.34	90.301
Qf_5
TB19_22	-24.3824	-65.7614	3404	2.01832e+06	66237.1	0.99	2.75	2	0	70.63	6.28
TB19_23	-24.3826	-65.7611	3407	2.33595e+06	78666	0.995416	2.75	2	0	82.69	7.326
TB19_24	-24.3828	-65.7614	3405	2.76524e+06	92378.3	0.995416	2.75	3	0	98.81	8.818
Qf_6
TB19_26	-24.4192	-65.7562	3531	2.15586e+06	70960.4	0.99	2.75	2	0	69.97	6.265
TB19_27	-24.4192	-65.7558	3532	2.51965e+06	84097.7	0.998363	2.75	1	0	81.85	7.314
TB19_28	-24.4192	-65.7557	3541	2.21899e+06	76225.5	0.998363	2.75	2	0	71.11	6.463
TB19_29	-24.4194	-65.7565	3525	2.47094e+06	82999.1	0.998363	2.75	3	0	82	7.33
Qf_7
TB19_33	-24.4035	-65.7511	3557	1.22483e+06	42968.3	0.998296	2.75	1	0	38.78	3.461
TB19_34	-24.4037	-65.7511	3555	1.86544e+06	63480.5	0.998296	2.75	2	0	59.28	5.354
TB19_35	-24.402	-65.7498	3563	2.10657e+06	73719.3	0.998296	2.75	3	0	66.94	6.125
Qf_8
TB19_38	-24.394	-65.7471	3533	1.43446e+06	47122.6	0.99713	2.75	1	0	44.34	4.079
TB19_42	-24.3927	-65.745	3553	1.42504e+06	49580.6	0.99713	2.75	1	0	43.65	4.044
TB19_45	-24.3904	-65.7494	3510	627190	23847.4	0.99713	2.75	1	0	22.37	1.826
TB19_46	-24.3914	-65.7503	3502	1.44164e+06	50504.8	0.99713	2.75	1	0	45.32	4.212
1: LSD scaling scheme (Lifton et al., 2014), ERA40 Atmosphere Model (Uppala et al., 2005), LSD framework for geomagnetic correction (Lifton et al., 2014), Reference (SLHL) production Rate: 3.74+0.09 at g-1 yr-1

## Sheet: 5) Qf_1 depth profile
Table S2.5. Sample depths and measured 10Be concentrations of Qf_1 depth profile. Fan age calculated with the Hidy et al. (2010) Monte Carlo depth profile simulator was 715.8 +35/ -217 ka. Inheritance measured: 0.26±0.42 x106 at/g.
Sample1	Sample depth		Be-10 concentration
	Depth	Uncertainty	Concentration	Uncertainty
	(cm)	(cm)	(106 at/g SiO2)	(106 at/g SiO2)
BBC-0	5	5	14.7	0.18
TB19_01A	5	5	14.97	0.48
BBC-1	23	5	11.8	0.11
TB19_01B	25	5	12.14	0.39
TB19_01C	45	5	10.88	0.35
BBC-2	53	28	7.76	0.07
TB19_01D	65	5	8.76	0.28
TB19_01E	120	5	4.94	0.16
BBC-3	123	41	5.21	0.06
BBC-4	187	23	2.3	0.03
1: TB19_01A-E from this study. ‘BBC-1-4’ from Tofelde et al. (2017).
