# Supplementary material for: Landscape response to tectonic deformation and cyclic climate change since ca. 800 ka in the southern central Andes
Source: Copernicus journal article supplement (doi:10.5194/esurf-12-1391-2024), 2024-12-12
Supplement: Supplementary file 1 [file esurf-12-1391-2024-supplement.zip]

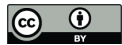

## *Supplement of*

# **Landscape response to tectonic deformation and cyclic climate change since ca. 800 ka in the southern central Andes**

**Elizabeth N. Orr et al.**

*Correspondence to:* Elizabeth N. Orr ([elizabeth.orr2@durham.ac.uk](mailto:elizabeth.orr2@durham.ac.uk))

- esurf-12-1391-2024-supplement-title-page.pdf
- Supplement
  - .DS\_Store
  - Supplement\_S1.docx
  - Supplement\_S2.xlsx
  - Supplement\_S3.xlsx
- \_\_MACOSX
  - Supplement
    - \* .\_.DS\_Store
    - \* .\_Supplement\_S1.docx
    - \* .\_Supplement\_S2.xlsx
    - \* .\_Supplement\_S3.xlsx

The copyright of individual parts of the supplement might differ from the article licence.
